# Supplementary material
Source: PubMed Central journal article supplement (PMC7856201)

Supp. Figure 1

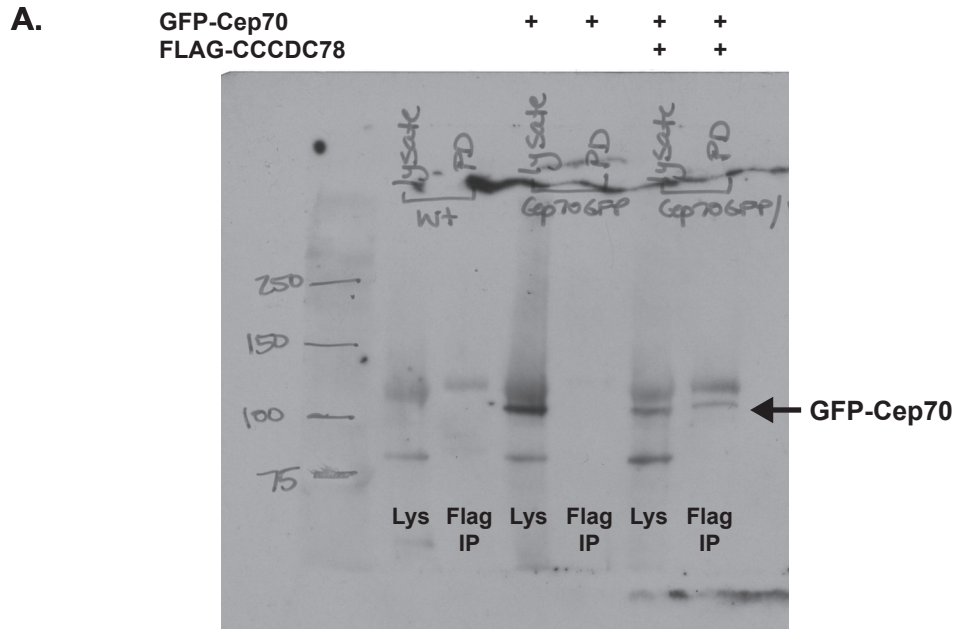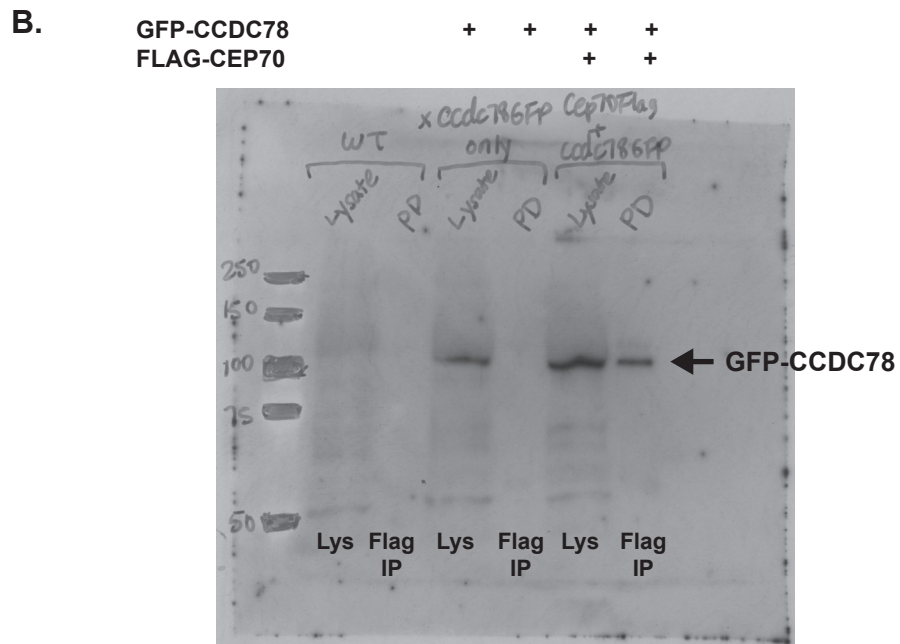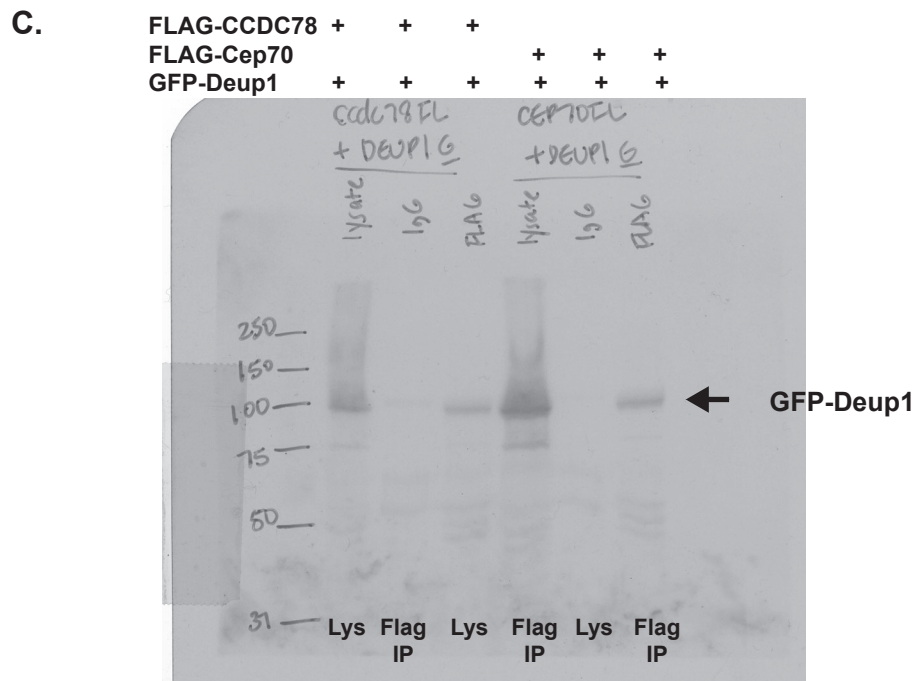

Supplement: NIHMS1654303-supplement-1.pdf [file NIHMS1654303-supplement-1.pdf]

## Supplemental Figure 2.

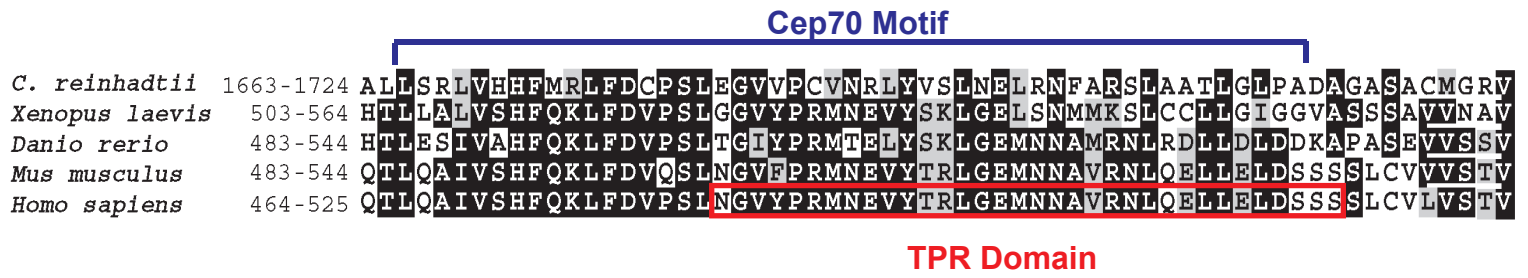

Supplement: NIHMS1654303-supplement-2.pdf [file NIHMS1654303-supplement-2.pdf]

Supp. Figure 3.

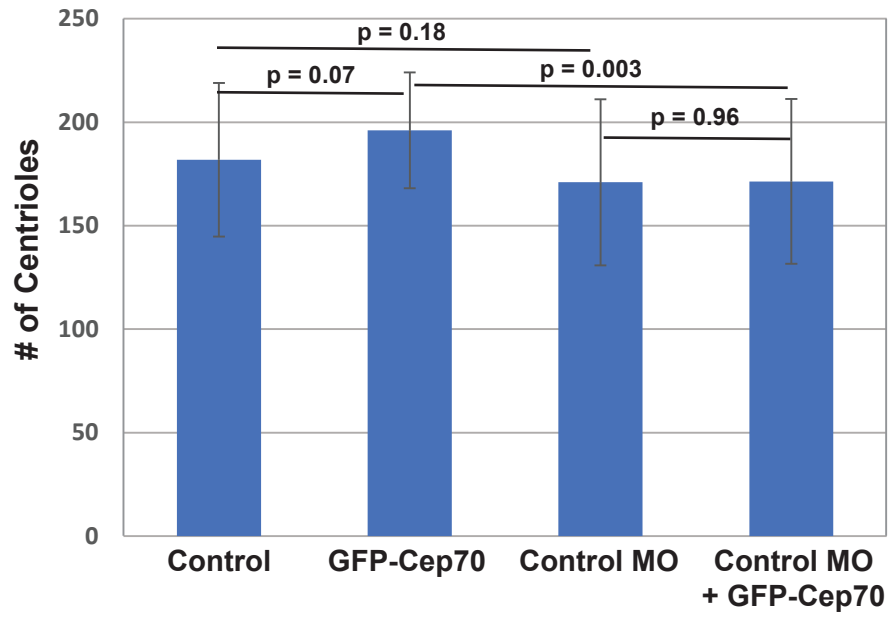

Supplement: NIHMS1654303-supplement-3.pdf [file NIHMS1654303-supplement-3.pdf]
